# Supplementary material for: Integrating Livestock Grazing and Sympatric Takin to Evaluate the Habitat Suitability of Giant Panda in the Wanglang Nature Reserve
Source: MDPI journal article supplement (doi:10.3390/ani11082469), 2021-08-23
Supplement: s1 [file s1]

## **Supplementary Material**

**Table S1** Location of giant panda presence data.

**Table S2** Location of livestock presence data.

**Table S3** Location of takin presence data.

**Table S1** Location of giant panda presence data.

| ID | Longitude(°) | Latitude(°) | ID | Longitude(°) | Latitude(°) |
|----|--------------|-------------|----|--------------|-------------|
| 1  | 104.09093    | 32.96144    | 18 | 104.02318    | 33.00099    |
| 2  | 104.10270    | 32.96457    | 19 | 104.02380    | 32.99542    |
| 3  | 104.09634    | 32.96433    | 20 | 104.02675    | 32.99877    |
| 4  | 104.11330    | 32.96280    | 21 | 104.04813    | 33.00152    |
| 5  | 104.07317    | 32.95887    | 22 | 104.04548    | 33.00061    |
| 6  | 104.12173    | 32.91701    | 23 | 104.14025    | 32.92956    |
| 7  | 104.11919    | 32.91792    | 24 | 104.10249    | 32.97890    |
| 8  | 104.13144    | 32.91159    | 25 | 104.10606    | 32.96480    |
| 9  | 104.13842    | 32.92562    | 26 | 104.11081    | 32.96292    |
| 10 | 104.14101    | 32.92394    | 27 | 104.17471    | 32.91580    |
| 11 | 104.15838    | 32.93334    | 28 | 104.12459    | 32.91697    |
| 12 | 104.16168    | 32.93292    | 29 | 104.16206    | 32.91542    |
| 13 | 104.16502    | 32.91818    | 30 | 104.12923    | 32.94150    |
| 14 | 104.16898    | 32.92125    | 31 | 104.07621    | 32.98972    |
| 15 | 104.10912    | 32.95931    | 32 | 104.08064    | 32.98835    |
| 16 | 104.14818    | 32.94906    | 33 | 104.08401    | 32.97136    |
| 17 | 104.12433    | 32.94156    |    |              |             |

**Table S2** Location of livestock presence data.

| ID | Longitude(°) | Latitude(°) | ID | Longitude(°) | Latitude(°) |
|----|--------------|-------------|----|--------------|-------------|
| 1  | 104.11010    | 32.96563    | 35 | 104.05209    | 32.98969    |
| 2  | 104.11403    | 32.96535    | 36 | 104.07189    | 32.98978    |
| 3  | 104.11406    | 32.96031    | 37 | 104.03960    | 33.00522    |
| 4  | 104.07745    | 32.97854    | 38 | 104.02575    | 33.01053    |
| 5  | 104.07341    | 32.97646    | 39 | 104.02275    | 33.02055    |
| 6  | 104.06992    | 32.97704    | 40 | 104.04552    | 32.88250    |
| 7  | 104.06409    | 32.97806    | 41 | 104.02100    | 33.00312    |
| 8  | 104.06330    | 32.97504    | 42 | 104.00782    | 32.99253    |
| 9  | 104.07345    | 32.97171    | 43 | 104.00554    | 32.98260    |
| 10 | 104.13388    | 32.94524    | 44 | 104.01699    | 32.99707    |
| 11 | 104.12693    | 32.94614    | 45 | 104.05145    | 32.90256    |
| 12 | 104.12352    | 32.94596    | 46 | 104.05961    | 32.93909    |
| 13 | 104.12010    | 32.94611    | 47 | 104.05836    | 32.91596    |
| 14 | 104.11411    | 32.94815    | 48 | 104.05334    | 32.91912    |
| 15 | 104.10968    | 32.94849    | 49 | 104.06293    | 32.92426    |
| 16 | 104.09919    | 32.97150    | 50 | 104.06676    | 32.92529    |
| 17 | 104.10119    | 32.97475    | 51 | 104.13882    | 32.93702    |
| 18 | 104.10480    | 32.97903    | 52 | 104.14272    | 32.93662    |
| 19 | 104.10802    | 32.98040    | 53 | 104.14533    | 32.93623    |
| 20 | 104.11309    | 32.96922    | 54 | 104.14782    | 32.93591    |
| 21 | 104.11262    | 32.97200    | 55 | 104.15150    | 32.93799    |
| 22 | 104.15356    | 32.91198    | 56 | 104.06863    | 32.95243    |
| 23 | 104.12024    | 32.96560    | 57 | 104.10908    | 32.95917    |
| 24 | 104.12444    | 32.96524    | 58 | 104.16145    | 32.91664    |

|    |           |          |    |           |          |
|----|-----------|----------|----|-----------|----------|
| 25 | 104.12885 | 32.96652 | 59 | 104.14803 | 32.95110 |
| 26 | 104.15479 | 32.93277 | 60 | 104.03111 | 32.87576 |
| 27 | 104.16637 | 32.91444 | 61 | 104.02402 | 32.87341 |
| 28 | 104.17207 | 32.92169 | 62 | 104.00472 | 32.99023 |
| 29 | 104.14488 | 32.95031 | 63 | 104.08900 | 32.97171 |
| 30 | 104.12855 | 32.95682 | 64 | 104.08588 | 32.97278 |
| 31 | 104.12672 | 32.96054 | 65 | 104.08468 | 32.97866 |
| 32 | 104.13447 | 32.94188 | 66 | 104.08939 | 32.98165 |
| 33 | 104.13028 | 32.93876 | 67 | 104.09335 | 32.98319 |
| 34 | 104.12454 | 32.93753 |    |           |          |

---

**Table S3** Location of takin presence data.

| ID | Longitude(°) | Latitude(°) | ID | Longitude(°) | Latitude(°) |
|----|--------------|-------------|----|--------------|-------------|
| 1  | 104.07352    | 32.95765    | 12 | 104.14527    | 32.90657    |
| 2  | 104.16220    | 32.91630    | 13 | 104.12363    | 32.91708    |
| 3  | 104.16617    | 32.91565    | 14 | 104.12080    | 32.91756    |
| 4  | 104.13093    | 32.91258    | 15 | 104.13012    | 32.91603    |
| 5  | 104.05216    | 32.99257    | 16 | 104.13877    | 32.92609    |
| 6  | 104.02524    | 33.00055    | 17 | 104.07191    | 32.99072    |
| 7  | 104.02412    | 33.02205    | 18 | 104.02941    | 32.99874    |
| 8  | 104.04713    | 32.90265    | 19 | 104.04803    | 33.00123    |
| 9  | 104.06735    | 32.92614    | 20 | 104.09368    | 32.96302    |
| 10 | 104.10778    | 32.95881    | 21 | 104.05882    | 32.97696    |
| 11 | 104.06155    | 32.97863    |    |              |             |
